# Supplementary material for: The modification effect of Fe2O3 nanoparticles on ZnO nanorods improves the adsorption and detection capabilities of TEA
Source: Royal Society of Chemistry journal article supplement (doi:10.1039/d1qi01339d), 2021-11-12
Supplement: d1qi01339d1.pdf [file d1qi01339d1.pdf]

The modification effect of Fe<sub>2</sub>O<sub>3</sub> nanoparticles on ZnO nanorods improves the adsorption and detection capabilities of TEA

Xiao Liang,<sup>a</sup> Jing Zhang,<sup>a</sup> Kewei Zhang,<sup>a</sup> Xiaodong Yang,<sup>\*b</sup> Mingzhe Zhang<sup>\*a</sup>

<sup>a</sup>State Key Laboratory of Superhard Materials, Physics of College, Jilin University, Changchun 130012, People's Republic of China

<sup>b</sup>School of Mechanical Engineering, Jilin Engineering Normal University, Changchun 130052, People's Republic of China

\* Corresponding author. Email address: zhangmz@jlu.edu.cn; y86908051@126.com

### **The details of theoretical simulation**

Our calculations performed in this paper were within the first-principles plane-wave pseudopotential density functional theory (DFT) as implemented in the VASP code. The projected augmented wave (PAW) method was employed and the generalized gradient approximation (GGA) Perdew-Burke-Ernzerhof (PBE) was used to describe the exchange-correlation interactions. A plane-wave cut-off energy (500 eV) for the expansion of the wave function into plane waves and a proper Monkhorst-Pack k-meshes sampled in the Brillouin zone were used to ensure the maximum atomic force in the system is less than 0.01 eV/atom and the energy difference of two iterations is less than 10<sup>-4</sup> eV/atom.

## The gas sensing testing process

### 1. Preparation of the testing gases

The desired concentrations of the testing gases (**acetone, methanal, ammonia, benzene, ethanol and methanol**) were obtained by the static gas distribution method, which was calculated by the following formula :

$$Q = \frac{V \times \varphi \times M}{22.4 \times d \times \rho} \times 10^{-9} \times \frac{273 + T_R}{273 + T_B} \quad (1)$$

where Q (mL) is the liquid volume of the volatile compound or gas volume, V (mL) is the volume of the testing chamber,  $\varphi$  is the required gas volume fraction, M (g mol<sup>-1</sup>) is the molecular molar mass, d (g·cm<sup>-3</sup>) is the specific gravity, and  $\rho$  is the purity of the volatile testing liquid or gas, T<sub>R</sub> and T<sub>B</sub> (°C) are the temperatures at ambient and the test chamber, respectively.

### 2. Measurement of gas sensing

When the resistance of the sensor became stable, a certain amount of test gases were injected into the test bottle using a syringe. After waiting for 20 minutes, put the gas sensor into the test bottle to measure corresponding resistance. The sensor then was took out and exposed to clean air in a testing chamber without analytes, which in a ventilated indoor environment.

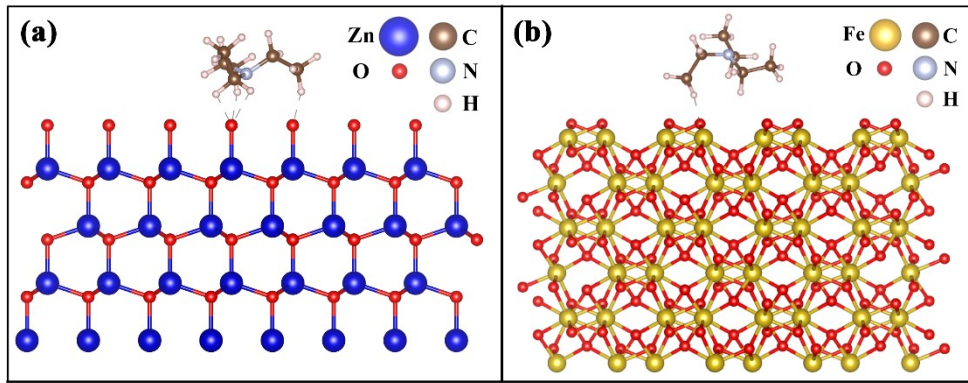

Fig. S1 The adsorption models to TEA molecule: (a) pure ZnO and (b) pure Fe<sub>2</sub>O<sub>3</sub>.

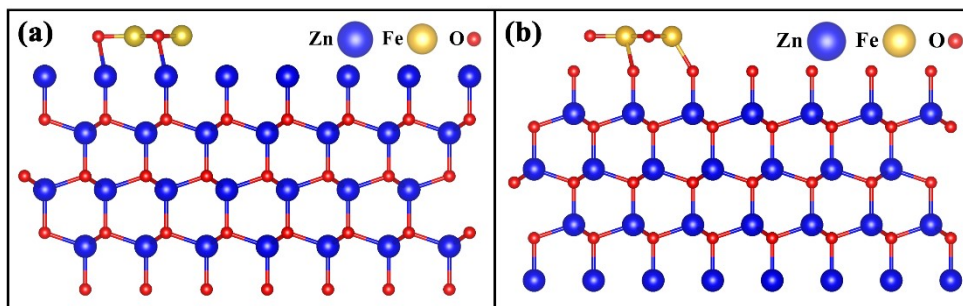

Fig. S2 The structural models of (a) M<sub>Zn</sub> and (b) Mo.

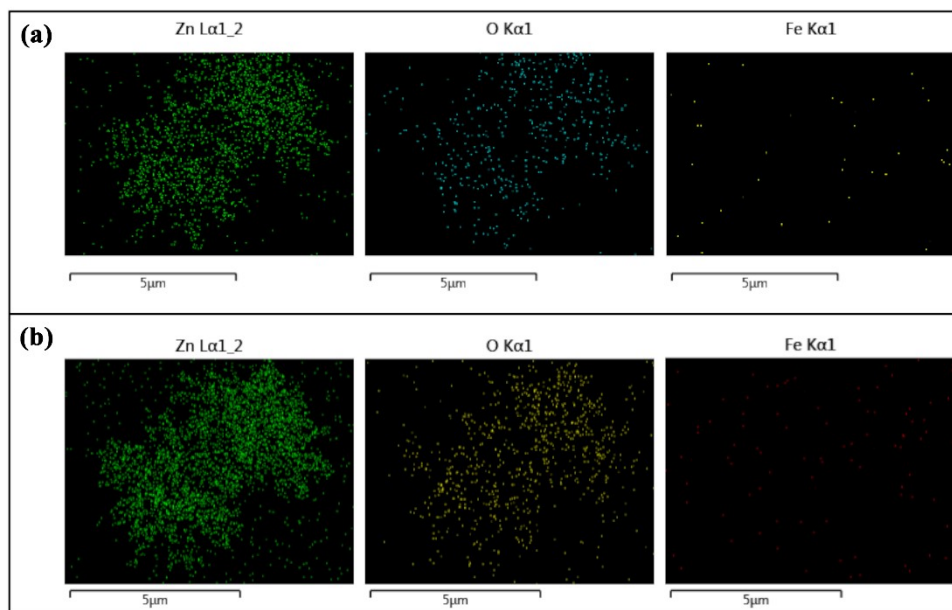

Fig. S3 The EDS image of (a) 1 wt% Fe<sub>2</sub>O<sub>3</sub>/ZnO and (b) 4 wt% Fe<sub>2</sub>O<sub>3</sub>/ZnO.

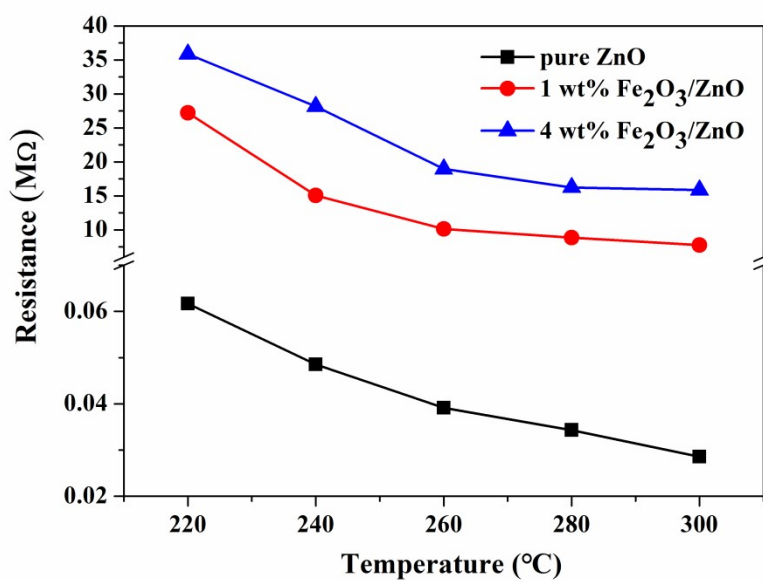

Fig. S4 The transient resistance of the pure ZnO, 1 wt% Fe<sub>2</sub>O<sub>3</sub>/ZnO and 4 wt% Fe<sub>2</sub>O<sub>3</sub>/ZnO in the air at different operating temperatures.

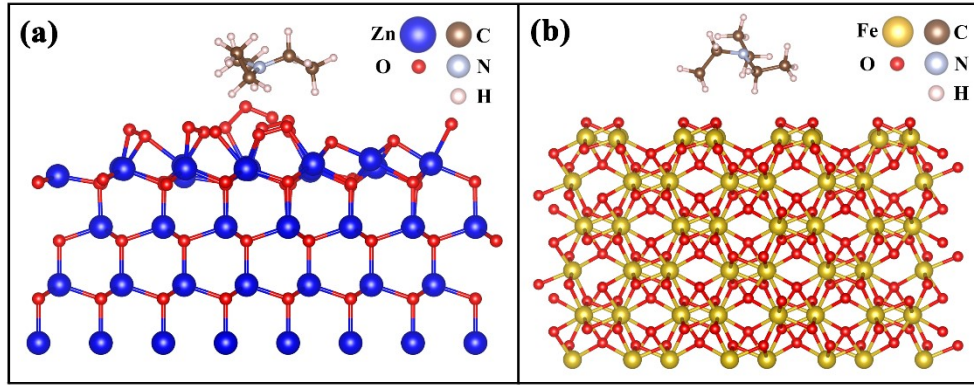

Fig. S5 The optimized adsorption models to TEA: (a) pure ZnO and (b) pure Fe<sub>2</sub>O<sub>3</sub>.

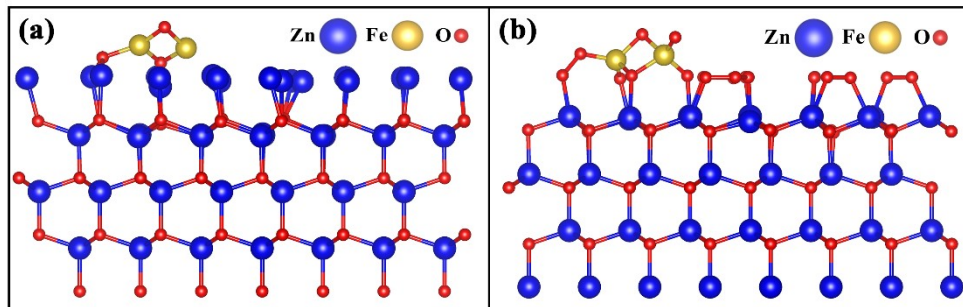

Fig. S6 The optimized structural models of (a) M<sub>Zn</sub> and (b) Mo.

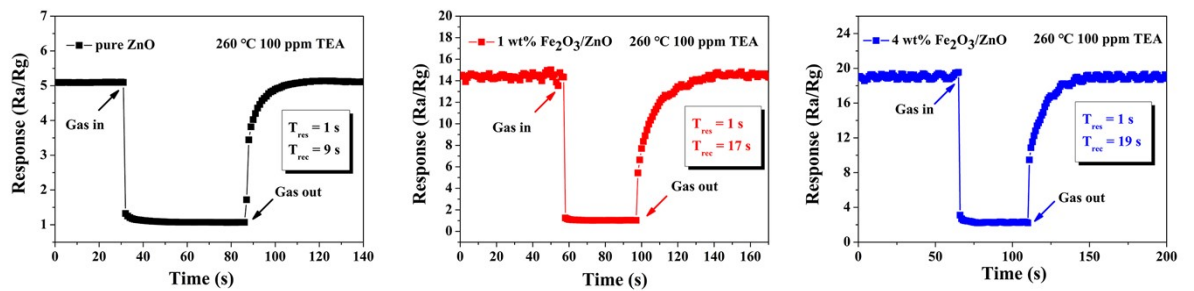

Fig. S7 The response curves of the sensors after 35 days.
